# Supplementary material for: Enzymatic synthesis of ionic responsive lignin nanofibres through surface poly(N-isopropylacrylamide) immobilization
Source: Royal Society of Chemistry journal article supplement (doi:10.1039/c4gc00757c), 2014-01-01
Supplement: c4gc00757c1.pdf [file c4gc00757c1.pdf]

## Supporting Information

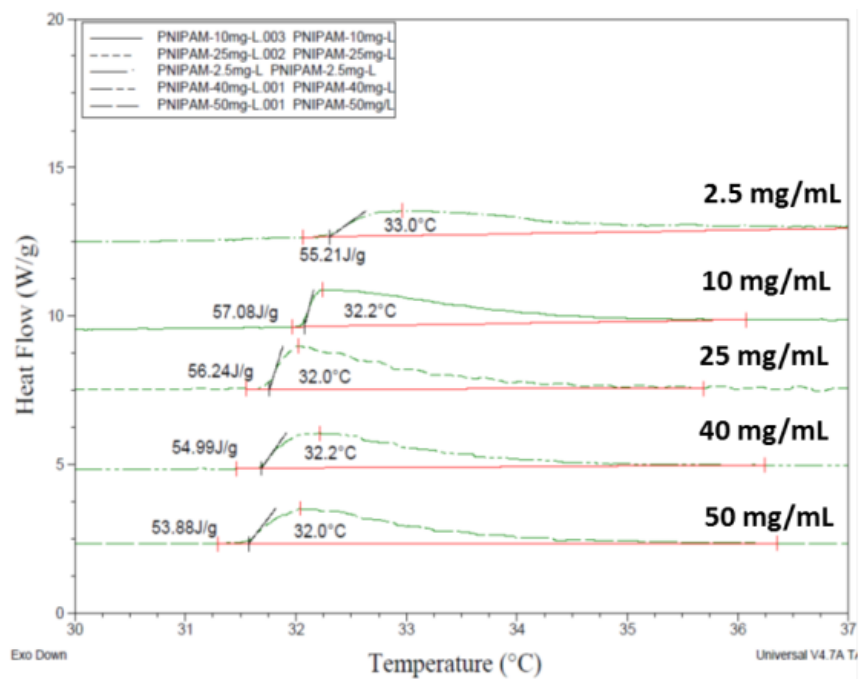

**Figure S1.** DSC analysis of the PNIPAM of various concentration.  $\Delta H = 6.28 \pm 0.18$  KJ/mol per NIPMA.<sup>1</sup>

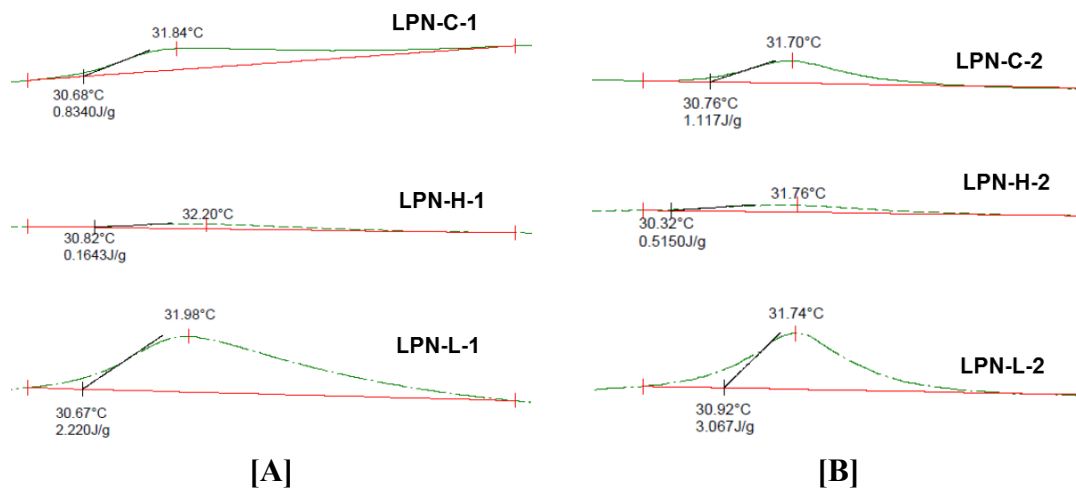

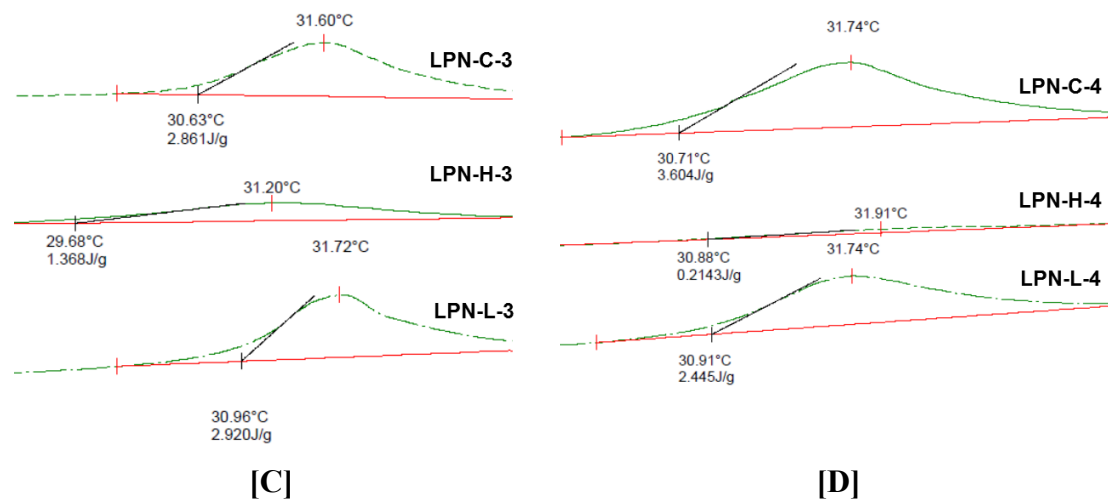

**Figure S2.** DSC analysis of the PNIPAM immobilized lignin nanofiber mats (samples in **Table 1**).

#### Reference

1. Kujawa, P.; Winnik, F. M. *Macromolecules* **2001**, *34*, 4130 – 4135.
